**Different DNA repair pathways  
are required  
following excision and integration  
of the DNA cut & paste transposon *piggyBat*  
in *Saccharomyces cerevisiae***

**Weifeng She, Courtney Busch Cambouris and Nancy L. Craig**

Howard Hughes Medical Institute

Department of Molecular Biology & Genetics

Johns Hopkins University School of Medicine

Baltimore, MD 21205

Corresponding author:

Nancy L. Craig

Howard Hughes Medical Institute

Department of Molecular Biology & Genetics

Johns Hopkins School of Medicine

502 PCTB, 725 N. Wolfe Street

Baltimore, MD 21205

voice = 410-955-3933 email = [ncraig@jhmi.edu](mailto:ncraig@jhmi.edu)

fax = 443-287-7798

## Abstract

The movement of transposable elements from place to place in a genome requires both element-encoded and host-encoded factors. In DNA cut & paste transposition, the element-encoded transposase performs the DNA breakage and joining reactions that excise the element from the donor site and integrate it into the new insertion site. Host factors can influence many aspects of transposition. Notably, host DNA repair factors mediate the regeneration of intact duplex DNA necessary after transposase action by repairing the double strand break in the broken donor backbone, from which the transposon has excised, and repairing the single strand gaps that flank the newly inserted transposon. We have exploited the ability of the mammalian transposon *piggyBat*, a member of the *piggyBac* superfamily, to transpose in *Saccharomyces cerevisiae* and used the yeast single gene deletion collection to screen for genes encoding host factors involved in *piggyBat* transposition. *piggyBac* transposition is distinguished by the fact that *piggyBac* elements insert into TTAA target sites and also that the donor backbone is restored to its pre-transposon sequence after transposon excision, that is, excision is precise. We have found that repair of the broken donor backbone requires the non-homologous end-joining repair pathway (NHEJ). By contrast, NHEJ is not required for DNA repair at the new insertion site. Thus multiple DNA repair pathways are required for *piggyBac* transposition.

## INTRODUCTION

Transposable elements are mobile DNA segments that have the ability to move from one position to another in a genome (Craig *et al.* 2002). They have significant impact on chromosome structure, function, and evolution in virtually all organisms and thus mediate multiple fundamental processes in biology. We are particularly interested in DNA cut-and-paste transposition in which an element-encoded transposase binds specifically to the transposon ends and mediates the DNA breakage and joining reactions that excise the element from the donor site and integrate it into a new insertion site (Peters and Craig 2001a; Peters and Craig 2001b). Studies in many systems have revealed that host factors can influence many aspects of transposition. Host factors can modulate the level of transposase, facilitate the assembly of the protein-DNA complexes in which transposition occurs by promoting DNA bending, channel insertions to particular target sites by interacting with the transposase and the target DNA, or facilitate the disassembly of highly stable post-transposition complexes (Wardle *et al.* 2009). Host DNA repair factors also play key roles in transposition. DNA repair reactions at the donor site and at the new insertion site are required to complete transposition by regenerating intact duplex DNA after transposase-mediated DNA breakage and joining. Excision of the transposon from the donor site by DNA double-strand breaks at the transposon ends leaves a double-strand gap in the donor DNA which must be repaired. Furthermore, the newly inserted transposon is flanked by single-strand gaps which also must be repaired. Repair of these gaps generates the target site duplications that flank the newly inserted transposon.

Here we exploit the genetic tractability of the yeast *Saccharomyces cerevisiae* and use the single gene deletion collection to screen for host factors involved in the excision and donor site repair of a mammalian *piggyBac* cut & paste transposon that is also active in yeast. As described in Results, our screen revealed that the NHEJ pathway is required for ligation of the gapped donor backbone.

*piggyBat*, a member of the *piggyBac* superfamily (Fraser *et al.* 1996) found in the little brown bat, *Myotis lucifugus* (Ray *et al.* 2008), was the first active mammalian DNA cut & paste transposable element to be identified (Mitra *et al.* 2013). We showed directly that *piggyBat* is an active transposon by assay of both transposon excision and integration in bat and human cells and in *S. cerevisiae*. As previously established with insect *piggyBac* (Mitra *et al.* 2008), *piggyBat* inserts specifically at TTAA target sites and excises precisely, that is the donor site is restored to its pre-insertion TTAA sequence.

The transposase-mediated DNA breakage and joining reactions that underlie *piggyBac* transposition was established by *in vitro* analysis of insect *piggyBac* transposition and involves four distinct steps (Figure 1) (Mitra *et al.* 2008). Because *piggyBac* inserts specifically into TTAA target sites, *piggyBac* in a donor site is flanked by TTAA direct repeats. Transposition is initiated by transposase nicking at the 3' ends of the transposon, followed by the attack of the newly exposed 3'OHs on the complementary donor strand four nt into the flanking donor DNA, forming TTAA hairpins on both transposon ends and releasing the transposon from the donor DNA site. The 5' ends of the donor gap also have TTAA overhangs. Rejoining of these overhangs can restore the donor site to its pre-transposon state, resulting in precise excision.

The TTAA hairpins on the excised *piggyBac* transposon ends are resolved by the transposase to form four nt TTAA overhangs at the 5' ends of the transposon. The released 3'OH transposon ends then attack the target TTAA sequence at staggered positions, covalently joining the transposon to the target DNA such that the transposon is flanked by single strand gaps. Repair of these gaps could occur by simple ligation of the TTAAAs on the 5' transposon ends to the target DNA or by a gap filling mechanism to form the target site duplications.

What host factors mediate these repair reactions at the gapped donor site and the insertion site? Studies of eukaryotic transposons have revealed that both non-homologous end-joining (NHEJ) and homology-dependent repair can be used to repair the donor site gaps (Mcvey *et al.* 2004; Yant and Kay 2003). The relative use of particular repair pathways is influenced by many factors including the nature of the donor stand breaks which differ for different superfamilies of elements, the host organism, the stage of the cell cycle or whether transposition is examined in the germline.

During NHEJ repair of the donor backbones, the broken DNA ends are often rejoined with limited processing such that “footprints” of the element and its flanking target site duplication usually remain following excision. Thus most transposon donor sites are not restored precisely to their pre-transposon sequence. Alternatively the gap may be repaired by homology-dependent repair in which repair is templated by a sister chromatid such that a copy of the transposon is regenerated at the donor site or, if the homolog lacks a copy of the transposon, the gapped donor site will be repaired without copying a transposon, resulting in apparent precise excision.

We show here that rejoining of the gapped *piggyBat* donor backbone, which contains TTAA sequences on their 5' ends, requires the NHEJ pathway in yeast. Simple ligation of these overhangs restores the donor site to its pre-transposon insertion state. We also show that repair of the gaps at the new insertion site does not require NHEJ and thus must use the non-NHEJ ligase Cdc9 ligase. Thus the regeneration of intact duplex DNA following *piggyBat* transposition requires multiple DNA repair activities despite the fact that both donor site and target site repair requires ligation of complementary overhanging TTAA sequences.

## METHODS

### Yeast strains.

BY4727 *MATa his3Δ200, leu2Δ0, lys2Δ0, met15Δ0 trp1Δ63* (Brachmann *et al.* 1998)

BY4741 *MATa his3Δ1 leu2Δ0 met15Δ0 ura3Δ0* (Brachmann *et al.* 1998)

BY4741 *MATa his3Δ1 leu2Δ0 met15Δ0 ura3Δ0* Single gene deletion strains (Giaever *et al.* 2002)

### Construction of pWSY1-Excision

pWSY1-Excision is a pRS414-based plasmid containing the *piggyBat* transposase gene under the control of the GAL5 promoter and a mini-*piggyBat* transposon, which contains a NatMX resistance cassette, inserted within *URA3*, forming *ura3::mini-piggyBat-Nat*. First, the *TRP1* gene on the pRS414 GAL5 *piggyBat* transposase plasmid pGB50 described by Mitra *et al.* (Mitra *et al.* 2013) was replaced with *URA3* by yeast homologous recombination in BY4727, using a PCR-generated *URA3* fragment flanked by 45 bp of the plasmid backbone, selecting for Ura<sup>+</sup>. The mini-*piggyBat-Nat* was constructed by cloning a NATMX cassette bounded by HindIII and SphI sites amplified from pSG37 (Gangadharan *et al.* 2010) by PCR into a pUC plasmid containing the *piggyBat* ends L513 and R208 separated by a polylinker containing HindIII and SphI sites. The mini-*piggyBat-Nat* element was introduced into the first TTAA (bp 64) of *URA3* by homologous recombination using a mini-*piggyBat-Nat* fragment amplified from

the pUC plasmid by PCR using primers complementary to *URA3*, selecting for resistance to clonNAT.

### ***piggyBat* excision and donor site repair assay**

A BY4727 pWS1-Excision colony freshly streaked on a SC + 2% glucose + 50 µg/ml clonNAT plate was inoculated into 5 ml of the same media and grown overnight at 30 °C. The cells were spun down, resuspended in 5 ml SC + 2% galactose + 50 µg/ml clonNAT and grown for 5 hours at 30°C. Cells were serially diluted and plated separately on YPD plates to determine the total number of cells and on SC - Ura + 2% glucose plates to determine the number of Ura<sup>+</sup> cells in which excision occurred. The excision frequency is Ura<sup>+</sup> cells/ total cells.

### **The genome-wide screen**

The yeast single gene deletion library in BY4741 was transformed *en masse* with the pWS1-Excision plasmid that carries a galactose-regulatable *piggyBat* transposase gene and *ura3::mini-piggyBat-Nat*, selecting for growth on SC + 2% glucose + 50 µg/ml clonNAT plates at 30°C. We performed three independent biological replicates starting from transformation of the library, obtaining at least 3 million transformants for each replicate. After growth for 48 hours, the transformants were recovered from the plates, concentrated, resuspended in 15% glycerol, and stored at -80°C.

To induce expression of the Gal-regulated *piggyBat* transposase, 25 OD<sub>600</sub> of transformed cells were inoculated into 200 ml SC + 2% galactose + 50 µg/ml clonNAT



and grown with shaking at 30°C for 5 hours. The cells were then recovered by centrifugation, washed and then resuspended.

To select cells in which *piggyBat* excision and repair of the *ura3::mini-piggyBat-Nat* donor site occurred, the induced transformants were grown-out in SC - Ura + 2% glucose. 25 OD<sub>600</sub> of the galactose-induced cells were grown in 1 liter at 30°C for 24 hours, repeating this selection process twice more such that the cells grew for about 25 generations in selective media. Plating on YPD and SC - Ura + 2% glucose revealed that more than 90% of the selected cells were indeed Ura<sup>+</sup>.

## Barcode recovery and analysis

We recovered the deletion library UPTAG barcodes after transposase induction and after selection for excisants by PCR and quantitatively compared these pools by next generation sequencing. The primers included an 8-nucleotide multiplex index sequence that harbored the Illumina-sequencing primer sequence. We combined the six UPTAG samples in a single run on the Illumina Miseq platform and about 0.2 million reads were obtained for each sample. The Illumina sequencing reads were assigned to different samples using the 8-nucleotide multiplex index sequences from cycle 1 to cycle 8. The 20-mer sequences from cycle 27 to cycle 46 were matched with the updated UPTAG barcode sequences using Bowtie (Langmead and Salzberg 2012). To avoid dividing by zero, we added a pseudo-count of 1 to all reads before calculating the normalized fold changes. We then mapped the reads to the yeast genome (Smith *et al.* 2009). In Table 1, only gene deletions are listed for which there are more than 10 reads after transposase induction was present for each replicate. Among the deletion strains

with log2 ratio >2.7, results from *Δynl296W*, *Δydl041W* and *Δynr005C* were omitted because their ORFs are dubious.

### **Construction of pWS2-Integration**

pWSY2-Integration is a pRS414-based plasmid containing the *piggyBat* transposase gene under the control of the GAL5 promoter, mini-*piggyBat-Nat* and *URA3* in the plasmid backbone. The plasmid containing GAL5-*piggyBat* transposase and *URA3* generated in the construction of pWS1-Excision was modified by the introduction of mini-*piggyBat-Nat* into the plasmid backbone by homologous recombination, using a PCR fragment containing mini-*piggyBat-Nat* flanked by 45 bp of plasmid sequence, selecting for resistance to clonNAT. To facilitate plasmid loss, a G to C point mutation was introduced by site-directed mutagenesis at position 8 of the *CDEI* element of the plasmid *CEN6* site.

### **Construction of pWS2-Integration Δtransposase**

The *piggyBat* transposase gene was removed by digestion of pWS2-Integration with BamHI and XhoI which cut at the 5'- and 3'-termini of the gene, respectively, followed by fill-in with T4 DNA polymerase and ligation.

### ***piggyBat* integration assay**

BY4727 pWSY2-Integration which contains mini-*piggyBat-Nat* or BY4727 pWS2-Integration Δtransposase colonies were isolated by growth on SC + 2% galactose + 50 μg/ml clonNAT plates for 5 days and then resuspended, serially diluted and plated on

SC + 2% glucose + 1 mg/ml 5-FOA plates to determine the total number of cells and on SC + 2% glucose + 1 mg/ml 5-FOA + 50  $\mu$ g/ml clonNAT plates, to determine the number of cells in which excision followed by integration occurred. The integration frequency is cells with an integration/total cells.

## RESULTS

### Development of a one-plasmid assay system for *piggyBat* excision

To assay *piggyBat* excision and donor site repair in yeast, we constructed pWSY1-Excision, a pRS414-based plasmid containing the *piggyBat* transposase gene under the control of the GALS promoter and a mini-*piggyBat* transposon, which contains a NatMX resistance cassette, inserted within a yeast *URA3* gene, forming *ura3::mini-piggyBat-Nat*. Because *URA3* is disrupted by the mini-*piggyBat-Nat* transposon, a *ura3* auxotrophic strain containing this plasmid remains a uracil auxotroph. *piggyBac* elements such as *piggyBat* excise precisely, restoring the donor site to its pre-transposon sequence (Mitra *et al.* 2008; Mitra *et al.* 2013). Thus when *piggyBat* excises from the *ura3::mini-piggyBat-Nat* donor site and the gapped donor site is repaired, *URA3* is expressed and the strain becomes a uracil prototroph (Figure 2). This provides a simple Ura<sup>-</sup> to Ura<sup>+</sup> assay for transposon excision and donor site repair following galactose induction of the *piggyBat* transposase in the *ura3Δ0* BY4727 strain.

We observed a mini-*piggyBat-Nat* excision frequency of about  $2.9 \times 10^{-2}$  Ura<sup>+</sup> cells/total cells upon galactose induction of the *piggyBat* transposase gene, a frequency about a thousand-fold higher than the background frequency of  $3.5 \times 10^{-5}$  Ura<sup>+</sup> cells/total cells without transposase induction. The excision frequency of *piggyBat* reported here with a single plasmid system is about 10-fold higher than that previously reported using two-plasmid *piggyBat* excision system (Mitra *et al.* 2013).

# **A genome-wide screen suggests that *piggyBat* excision and donor site repair is decreased in strains lacking components of the NHEJ pathway**

To identify host factors involved in *piggyBat* transposition, we screened a pool of yeast haploid non-essential single gene deletion strains (Giaever *et al.* 2002) transformed with pWS1-Excision for mutant strains in which transposon excision and/or donor site repair was altered. To identify deletion strains in which transposition was altered, we compared the fraction of each deletion in the transformant pool following transposase induction to the fraction of each deletion strain in the pool following selection for transposon excision and donor site repair. Genes whose deletion result in a decrease in their fraction in the deletion pool after transposition likely encode host factors required for excision and/or donor site repair. By contrast, genes whose deletion result in an increase in their fraction in the deletion pool likely encode host factors that inhibit transposition.

We performed three independent biological replicates starting from transformation of the haploid deletion pool with pWS1-Excision, selecting for plasmid-based clonNAT resistance on SC + 2% glucose + 50 µg/ml clonNAT plates and obtained at least 3 million transformants for each replicate, i.e. about 600-fold coverage of the ~ 5000 single gene deletion library. Following recovery of the transformants in liquid, expression of transposase was induced by growth in SC + 2% galactose + 50 µg/ml clonNAT. To select cells in which *piggyBat* excision and repair of the *ura3::mini-piggyBat-Nat* donor site to *URA3* occurred, the induced transformants were grown for several cycles in SC - Ura + 2% glucose.

We determined the abundance of each deletion strain in the transformant pools in which transposase was expressed by growth in galactose (SC + 2% galactose) and the pools in which *piggyBat* excision and donor site repair occurred by growth in absence of uracil (SC – Ura + 2% glucose). For each pool, we recovered the deletion library barcodes by PCR and quantitatively compared the strains in these pools by next generation sequencing.

Analysis of the barcodes in the three replicate pools following transposase induction revealed that 4,043 of the mutants had at least one read per pool and ~ 3,300 mutant strains had at least 5 reads per pool. Thus plasmid transformation and growth in SC + 2% glucose + 50 µg/ml clonNAT, followed by transposase induction in SC + 2% galactose, resulted in the loss of about 20% of the original deletion mutant pool.

We also determined the number of reads for each deletion strain in the three replicate pools grown in the absence of uracil (SC - Ura + 2% glucose) to select for transposon excisants. For each replicate, we calculated the log<sub>2</sub> ratio of the number of reads present before and after selection for *piggyBat* excision for each strain. The 4043 deletion strains present after selection for excision and their log<sub>2</sub> ratios are shown in Supplemental Table S1. Comparison of the log<sub>2</sub> ratios of the three replicates gave correlation coefficients of about 0.6 (Supplemental Figure S1) and thus we averaged the log<sub>2</sub> ratios from the three replicates.

34 of the 4,043 deletion strains had log<sub>2</sub> ratios after selection for excision compared to those after transposase induction that decreased > 2.7 fold (Table 1). These genes are candidates for genes that encode host factors required for

transposition. No gene candidate for host factors that inhibit transposition was identified as no deletion strain had a log2 ratio > 2.0 (Supplemental Table S1).

Notably, upon selection for Ura<sup>+</sup> excisants, the log2 ratio of *Δura2* and *Δura4* strains decreased ~ 6.17-fold and 4.31-fold, respectively (Table 1). Both these genes are required for uracil biosynthesis (Benoist *et al.* 2000; Lacroute 1968). When assayed in individual *Δura2* and *Δura4* deletion strains (Figure 3), *piggyBat* excision assayed by Ura<sup>+</sup> selection decreased more than 10,000-fold. Thus our selection for transposase-dependent Ura<sup>+</sup> excisants successfully identified deletion mutants that blocked formation of Ura<sup>+</sup> products.

Omitting the *Δura2* and *Δura4* mutants, and also *Δynl296W*, *Δydl041W* and *Δynr005C* because their ORFs are dubious, we used FunSpec (<http://funspec.med.utoronto.ca>) to explore the cellular functions of the genes deleted in the strains whose log2 ratio decreased > 2.7-fold upon selection for excision. We found that genes for the GO Biological Process Category Double-strand break repair via non-homologous end joining (NHEJ) [GO:0006303] were significantly enriched (P = 8.6e-12) among these 32 genes. Our screen identified 7 of 25 genes in this category, including *DNL4*, *LIF1*, *NEJ1*, *YKU70*, *YKU80*, *SIR2*, and *SIR3* (Table 1). As described below, *piggyBat* excision and donor site repair were defective in strains individually deleted for NHEJ genes.

Why weren't the other 17 genes involved in NHEJ-mediated repair identified in our screen? Recall that only 4,043 of the initial library of 5171 deletion strains were present in the library after growth in SC + 2% galactose. Notably, strains deleted for the NHEJ genes *FYV6*, *MRE11*, *POL2*, *RSC2*, *SIN3* and *VPS75* were not present among

these 4043 strains (Supplemental Table 1). Although strains deleted for the NHEJ genes *DOA1*, *IRC20*, *MCK1*, *POL4*, *RAD27*, *RAD50*, *RSC1*, *RTT109*, *SIR4*, *SRS2*, *SUB1* and *XRS2* were present among these 4043 deletion strains, the decreases in their log2 ratios in the induced compared to the excisant pools were not > 2.7 (Supplemental Table 1).

We also assayed *piggyBat* excision and donor site repair in deletion strains individually deleted for the 25 non-NHEJ and non-Ura genes identified in Table 1 except for *Δrtc2*, *Δswd1* and *Δyor008c-a*. Excision was not significantly decreased in most of these strains (Supplemental Figure S2). However, excision was significantly ( $\geq 10$ -fold) reduced in six of these 22 mutants, *Δdal81*, *Δapc9*, *Δaac3*, *Δrps12*, *Δthr4* and *Δcoa1* (Figure 3). We also observed that excision was significantly decreased ( $\geq 10$ -fold) in the deletion strains *Δrsm25*, *Δfaa3* and *Δpdr17* in the course of other experiments. Why deletion of these genes affects *piggyBat* excision and donor site repair remains to be determined.

### ***piggyBat* excision is defective in individual strains lacking components of the NHEJ pathway**

The core components of the NHEJ repair machinery (Dudasova *et al.* 2004) identified in our screen are the DNA end binding protein Ku complex (*YKU70*, *YKU80*), the DNA ligase IV (*DNL4*) and its associated proteins Lif1/Xrcc4 (*LIF1*), and Nej1 (*NEJ1*), which is the yeast ortholog of the mammalian NHEJ component XLF (XRCC4-like factor; Cernunnos). To verify that these NHEJ pathway genes are indeed involved in donor site repair after *piggyBat* excision, we measured the excision frequency of



*piggyBat* in individual  $\Delta yku70$ ,  $\Delta yku80$ ,  $\Delta dnl4$ ,  $\Delta lif1$  and  $\Delta nej1$  strains using the pWSY1-Excision assay, finding that the frequency of *piggyBat* excision in the  $\Delta yku70$ ,  $\Delta yku80$ ,  $\Delta dnl4$ , and  $\Delta lif1$  strains was about 10,000-fold lower than that in the parental BY4727 strain. Excision in the  $\Delta nej1$  strain is about 100-fold lower than that in the parental BY4727 (Figure 4).

NHEJ in yeast also requires Mre11, Rad50 and Xrs2, which form the MRX complex (Rine and Herskowitz 1987; Trujillo *et al.* 2003). However, strains with these deletions were not present in the pre-excision deletion pool after growth in SC + 2% galactose + 50  $\mu$ g/ml clonNat (Supplemental Table 1). Analysis of *piggyBat* excision in strains individually deleted for these genes revealed that excision was about 100-fold lower in these strains than in the parental BY4727 strain (Figure 4).

### ***piggyBat* excision and donor site repair is reduced in diploids**

The NHEJ pathway is down-regulated in diploids (Valencia *et al.* 2001). Although the starting single gene deletion strains in our screen were haploids, diploid formation can occur when mating type switching is de-repressed. Such de-repression, diploid formation and hence reduction of NHEJ repair, occurs in strains defective for Sir2, Sir3, and Sir4, which repress the mating type loci (Rine and Herskowitz 1987). We observed in our screen that *piggyBat* excision was decreased in  $\Delta sir2$ , and  $\Delta sir3$  strains (Table 1). *piggyBat* excision in individual  $\Delta sir2$ ,  $\Delta sir3$ , and  $\Delta sir4$  strains, was decreased about 10-fold compared to excision in the parental haploid strain (Figure 3).

We also examined *piggyBat* excision and donor site repair in a diploid generated by mating the haploid BY4727 *MATa* pWSY1-Excision strain with the haploid BY4741

*MAT $\alpha$*  strain, finding that *piggyBat* excision and donor site repair in the diploid strain was about 20-fold lower than that in a haploid strain (Table 2).

Thus the results of our screen and assays in individual deletion strains implicate the NHEJ pathway in gapped donor site repair after *piggyBat* excision. Although it might be argued that from the results described thus far, the NHEJ pathway is required for *piggyBat* excision *per se* rather than donor site repair, we show below that *piggyBat* does excise in NHEJ mutants.

### **NHEJ repair is not required for *piggyBat* integration**

The excised *piggyBat* transposon has 3'OHs on its 3' ends and TTAA extensions on its 5' ends (Figure 1). During integration the 3'OH ends attack both strands of the target DNA at staggered positions, resulting in covalent attachment of the 3' *piggyBat* ends to the target DNA. One pathway for the regeneration of intact duplex DNA at the insertion site would be for the TTAA's on the 5' transposon ends to anneal to the complementary TTAA sequences of the target DNA, followed by ligation. One potential source of this ligation activity is NHEJ DnI IV ligase complex. Thus we analyzed *piggyBat* integration in NHEJ mutants.

To assay integration, we constructed pWSY2-Integration, a pRS414-based plasmid containing the *piggyBat* transposase gene under the control of the GALS promoter, a mini-*piggyBat*-*Nat* transposon, and *URA3* in the plasmid backbone. Integration was measured by selecting for cells that have lost the plasmid by growth on 5-fluoroorotic acid (5-FOA<sup>R</sup>) and in which the mini-*piggyBat*-*Nat* had jumped to the chromosome (clonNat<sup>R</sup>) (Figure 5). The observed *piggyBat* integration frequency in

BY4727 is about  $5.8 \times 10^{-2}$  5-FOA<sup>R</sup> clonNat<sup>R</sup> cells/ total cells (Figure 6). We found that the frequency of *piggyBat* integration in all these NHEJ  $\Delta yku70$ ,  $\Delta yku8$ ,  $\Delta dnl4$ ,  $\Delta lif1$ , and  $\Delta nej1$  mutant strains was about the same as that in parental strain BY4727.

Therefore we conclude that the ligation machinery provided by the NHEJ pathway is not required for the repair of *piggyBac* integrants.

The other source of yeast ligase activity is DNA ligase 1 encoded by *CDC9*, which is an essential gene, making its role in *piggyBat* integration difficult to establish (Willer *et al.* 1999).

## Discussion

Here we have explored the requirements for *S. cerevisiae* host factors in transposition of the eukaryotic mammalian cut & paste transposable element *piggyBat*, a member of the widespread *piggyBac* superfamily (Fraser *et al.* 1996; Sarkar *et al.* 2003), which we have previously demonstrated is active in yeast (Mitra *et al.* 2008). We used a single plasmid-based excision reporter system in a high-throughout screen using the haploid yeast single gene deletion collection. We had anticipated that deletion of genes involved in a variety of cellular processes including various DNA-based transactions might affect transposition but found that our screen highlighted only genes involved in NHEJ as being necessary for *piggyBat* excision and donor site repair. A limited dependence on host factors is, however, consistent with the fact that only *piggyBac* transposase is required for transposition *in vitro* (Mitra *et al.* 2008) and that *piggyBac* transposition is highly efficient in a wide variety of organisms ranging from yeast, protozoa, planeria, insects, plants, and a variety of vertebrates including mammals, as well as various types of stem cell (Ding *et al.* 2005; Gonzalez-Estevez *et al.* 2003; Handler 2002; Nishizawa-Yokoi *et al.* 2015). It should be noted, however, that our screen tested involvement of only about 4043 of the haploid non-essential 5171 yeast genes in *piggyBac* transposition, likely because we used minimal synthetic complete media.

The requirement for NHEJ to repair the broken donor backbone from which *piggyBat* has excised is compatible with the known biology and chemical steps of *piggyBac* excision (Mitra *et al.* 2008). *piggyBac* inserts into TTAA sites such that upon

*piggyBac* excision, the flanking donor DNA has TTAA overhangs on both 5' ends of the broken donor DNA (Figure 1). Annealing of these fully complementary TTAA overhangs followed by ligation can restore the donor site to its original TTAA sequence, consistent with *piggyBac* precise excision. Other work (Daley *et al.* 2005) has established that NHEJ in yeast requires the end binding complex MRX (Mre11-Rad50-Xrs2) (Dudasova *et al.* 2004), which is recruited early to DSBs. The core complex Ku (yKu70-yKu80) binds to and protects the broken ends and the DNL IV ligase (DnlIV-Lif1-Nej1), is recruited by Ku. We have demonstrated that *piggyBat* excision and donor site repair is highly defective in mutant strains deleted for the genes encoding these proteins.

The core NHEJ Ku and DNL IV complex genes are conserved in all eukaryotes (Symington and Gautier 2011) and thus likely mediates repair of the donor site for *piggyBac* transposons in its varied hosts including *piggyBat* in its mammalian host the little brown bat (Mitra *et al.* 2013; Ray *et al.* 2008). Notably, programmed gene assembly in *Paramecium* that is mediated by a domesticated *piggyBac*-like transposase also requires NHEJ (Dubois *et al.* 2012).

The NHEJ pathway is also involved in donor site repair for other DNA cut & paste transposons such as *Ac/Ds* as studied in maize (Rinehart *et al.* 1997) and yeast (Yu *et al.* 2004), and *Sleeping Beauty* in mammalian cells (Walisko *et al.* 2006; Yant and Kay 2003), although in these cases excision does not regenerate the pre-transposon donor site, rather usually leaving footprints that derive from the target site duplications (Rinehart *et al.* 1997; Woodard *et al.* 2012).

The structure of a newly inserted *piggyBac* element is related to the structure of the gapped donor site in that both contain complementary TTAA sequences (Figure 1).

The newly inserted transposon has TTAA extensions at its 5' ends that can anneal to the complementary target DNA TTAAAs derived from the staggered joining positions of the transposon to the TTAA target site. Upon TTAA annealing, the newly inserted transposon is flanked by nicks such that formation of intact duplex DNA requires only ligation. Note also that upon *piggyBat* insertion there are only nicks in the new *piggyBat* insertion site that could be sealed by ligation to generate intact duplex DNA. Notably, however, we have found that the NHEJ Dnl IV ligation complex is not required following transposon insertion to generate intact duplex DNA at the insertion site nor are other NHEJ components required. Thus we imagine that the other cellular ligase, DNA ligase 1 which is the *CDC9* gene product, can seal the nicks at the target site.

More extensive target site repair than simple ligation is required upon integration of non-target site-specific transposons and retroviral elements because in these cases the 3' OH target DNA ends are flanked by single strand gaps (Craig 2002) rather than simple nicks as discussed above for *piggyBac* elements. Repair of these flanking gaps could reasonably result from gap-filling by a repair polymerase followed by ligation (Syvanen *et al.* 1982) or possibly by a more elaborate gap-filling mechanism related to that used by bacteriophage *Mu* (Choi and Harshey 2010). We cannot exclude the possibility that repair of a *piggyBac* insertion site may also proceed by removal of the TTAAAs at the 5' transposon ends, and repair of the flanking gaps by a repair polymerase and ligase. Insertion site DNA repair of some bacterial elements has been shown to also require host-mediated disassembly of highly stable post-transposition transposase-DNA complexes (Abdelhakim *et al.* 2010; North and Nakai 2005). It will be interesting to see if such processes might also be required for DNA repair at eukaryotic transposon

insertions sites.

### **Acknowledgements**

We are grateful to Jef Boeke, Pam Meluh, Kuang Zheng and Sarah Wheelan for their considerable assistance in this project. We also thank Henry Levin for his thoughtful comments on the manuscript and Patti Kodeck for her assistance in preparing the manuscript. NLC is an investigator of the Howard Hughes Medical Institute.

## Figure Legends

Fig 1. *piggyBac* transposition pathway. *piggyBac* transposition is initiated by nicks at the 3' transposon ends. The exposed 3'OHs then attack the complementary strand 4 nt inside the flanking donor DNA to form the hairpins on the transposon ends. Once the transposon is released from the donor site, the double strand break in the donor backbone is precisely repaired to the pre-insertion TTAA sequence. The hairpins on the transposon ends are nicked at the 3' transposon ends to expose the 3'OHs. The 3'OH transposon ends attack the TTAA target sequence at staggered positions, forming covalent links between the 3' ends of the transposon and the 5' ends of the target site. The single strand gap between the 3' ends of the target DNA and the 5' ends of the transposon are repaired to generate the four bp TTAA target sequence duplication.

Fig 2. Schematic of the *piggyBat* excision assay. *piggyBat* is excised from *ura3::mini-piggyBat-Nat* upon transposase induction and the gapped donor backbone is repaired to generate *URA3*, the cell being converted from a uracil auxotroph to a uracil prototroph.

Fig 3. The *piggyBat* excision frequency assayed in individual deletion mutants. *piggyBat* excision was determined using pWS1-Excision in the indicated deletion mutant strains. The average frequency of three independent experiments is shown.



Fig 4. The *piggyBat* excision frequency assayed in individual NHEJ deletion mutants.

*piggyBat* excision was determined using pWS1-Excision in the indicated NHEJ deletion mutant strains. The average frequency of three independent experiments is shown.

Fig 5. The *piggyBat* integration assay. Mini-*piggyBat*-*Nat* on a *URA3* plasmid is excised upon transposase induction and can integrate in the chromosome. Integration events are assayed as cells that retain the mini-*piggyBat*-*Nat* (Clon<sup>R</sup>) but have lost the donor plasmid (5-FOA<sup>R</sup>).

Fig 6. *piggyBat* integration frequency in individual NHEJ deletion mutants. *piggyBat* integration using pWS2-Integration was measured in the indicated deletion strains. The average integration frequency of three independent experiments is shown. *piggyBat* excision frequency was also assayed in each deletion strain using pWS2-Integration  $\Delta$ transposase and the frequency of excision was at least 100-fold lower than with transposase.

**Table 1 34 genes for which deletion results in a decrease in log2 ratio of cells present after selection for excision compared to cells present after transposase induction decreased log2 < 2.7.**

| Gene Deleted             | Log2 Ratio | Protein function                                                                                                     |
|--------------------------|------------|----------------------------------------------------------------------------------------------------------------------|
| <i>Δdnl4<sup>a</sup></i> | -6.21      | NHEJ DNA ligase which interacts with Lif1 and Nej1                                                                   |
| <i>Δura2</i>             | -6.16      | Catalyzes the first two steps in pyrimidine biosynthesis                                                             |
| <i>Δthr4</i>             | -5.75      | Threonine synthase required in threonine biosynthesis                                                                |
| <i>Δthr1</i>             | -5.54      | Homoserine kinase required in threonine biosynthesis.                                                                |
| <i>Δyku70</i>            | -5.40      | Subunit of the Ku complex (yKu70-yKu80) required for NHEJ, which also binds to telomeres.                            |
| <i>Δlif1</i>             | -5.09      | Component of the NHEJ DNA ligase IV repair complex; physically interacts with Dnl4 and Nej1                          |
| <i>Δyku80</i>            | -4.95      | Subunit of the Ku complex (yKu70-yKu80) required for NHEJ, which also binds to telomeres.                            |
| <i>Δftr1</i>             | -4.81      | High affinity iron permease; forms complex with Fet3.                                                                |
| <i>Δnej1</i>             | -4.79      | Interacts with NHEJ DNA ligase IV components Dnl4 and Lif1; repressed by MAT heterozygosity                          |
| <i>Δrvs161</i>           | -4.74      | Amphiphysin-like lipid raft protein, which regulates multiple cell responses following starvation or osmotic stress. |
| <i>Δura4</i>             | -4.31      | Dihydroorotase involved in pyrimidine biosynthesis                                                                   |

|               |        |                                                                                                                       |
|---------------|--------|-----------------------------------------------------------------------------------------------------------------------|
| <i>Δino4</i>  | -4.13  | Transcription factor involved in phospholipid synthesis                                                               |
| <i>Δcho2</i>  | -4.10  | Phosphatidylethanolamine methyltransferase involved in conversion of phosphatidylethanolamine to phosphatidylcholine. |
| <i>Δsac7</i>  | --4.09 | GTPase activating protein (GAP) for Rho1, which controls organization of the actin cytoskeleton.                      |
| <i>Δrsm25</i> | -3.96  | Mitochondrial ribosomal protein of the small subunit.                                                                 |
| <i>Δfet3</i>  | -3.87  | Ferro-O <sub>2</sub> -oxidoreductase                                                                                  |
| <i>Δvps5</i>  | -3.64  | Nexin-1 homolog required for localizing proteins from a prevacuolar/late endosomal compartment back to late Golgi.    |
| <i>Δdal81</i> | -3.44  | Positive gene regulator in nitrogen degradation pathways                                                              |
| <i>Δbre1</i>  | -3.32  | E3 ubiquitin ligase; forms heterodimer with Rad6 to monoubiquitinate histone H2B-K123                                 |
| <i>Δrad18</i> | -3.16  | E3 ubiquitin ligase, which forms heterodimer with Rad6 to monoubiquitinate PCNA-K164                                  |
| <i>Δcoa1</i>  | -3.13  | Mitochondrial inner membrane protein; required for assembly of the cytochrome c oxidase complex.                      |
| <i>Δino2</i>  | -3.09  | A component of the Ino2/Ino4 transcription activator required for derepression of phospholipid biosynthetic genes     |
| <i>Δrtc2</i>  | -3.08  | Putative vacuolar membrane transporter for cationic amino acids                                                       |
| <i>Δgos1</i>  | -3.05  | v-SNARE protein involved in Golgi transport                                                                           |
| <i>Δgef1</i>  | -3.04  | Voltage-gated chloride channel; involved in cation homeostasis.                                                       |

|                          |       |                                                                                                                 |
|--------------------------|-------|-----------------------------------------------------------------------------------------------------------------|
| <i>Δamd1<sup>b</sup></i> | -3.03 | AMP deaminase which enzyme catalyzes the deamination of AMP to form IMP and ammonia.                            |
| <i>Δsir2</i>             | -2.97 | <b>Sirtuin histone deacetylase; interacts with Sir3 and Sir4 to silence HML, HMR, telomeres, and rDNA loci.</b> |
| <i>Δsir3</i>             | -2.96 | <b>Silencing protein that interacts with Sir2 and Sir4 to silence HML, HMR, telomeres, and rDNA loci.</b>       |
| <i>Δaac3</i>             | -2.91 | Mitochondrial inner membrane ADP/ATP translocator                                                               |
| <i>Δarp1</i>             | -2.90 | Actin-related protein of the dynactin complex; required for spindle orientation and nuclear migration.          |
| <i>Δdyn3</i>             | -2.83 | Dynein light intermediate chain; localizes with dynein, null mutant is defective in nuclear migration.          |
| <i>Δswd1</i>             | -2.78 | Set1C/COMPASS complex subunit; methylates histone H3 for transcriptional silencing near telomeres.              |
| <i>Δrps12</i>            | -2.74 | Protein component of the small (40S) ribosomal subunit.                                                         |
| <i>Δyor008c</i>          | -2.71 | Uncharacterized ORF                                                                                             |
| <i>a</i>                 |       |                                                                                                                 |

<sup>a</sup> NHEJ genes in **bold**

<sup>b</sup> There are 2 different *AMD1* deletions, *Δym1035C-1* log 2 = -3.03 and *Δym1 035C-2* log 2 = -2.76

**Table 2. *piggyBat* excision frequency in haploid and diploid cells.**

Haploid: *MATα his3Δ200 leu2Δ0 lys2Δ0 mat15Δ0 trp1Δ63 ura3Δ0*

Diploid: *MATα/MATα his3Δ1/his3Δ200 leu2Δ0/leu2Δ0 lys2/lys2Δ0 met15 Δ0/mat15Δ0  
trp1/trp1Δ63 ura3Δ0/ura3Δ0*

| Strain  | Without                        | With                           |
|---------|--------------------------------|--------------------------------|
|         | transposase induction          | transposase induction          |
| Haploid | $1.30 \pm 0.09 \times 10^{-4}$ | $2.11 \pm 0.08 \times 10^{-2}$ |
| Diploid | $1.86 \pm 2.54 \times 10^{-5}$ | $1.26 \pm 0.53 \times 10^{-3}$ |

*piggyBat* excision frequency was determined using pWS1-Excision

## SUPPLEMENTAL DATA

### Figure Legends

**Supplemental Figure 1** Correlation values for comparison of log2 ratios of barcode sequencing reads from three independent experimental replicates

**Supplemental Figure 2** The *piggyBat* excision frequency re-assayed in indicated individual deletion mutants. *piggyBat* excision was determined using pWS1-Excision in the indicated deletion mutant strains. The average frequency of three independent experiments is shown.

**Supplemental Table S1. Comparison of the number of gene copies present after selection for excision compared to gene copies present after transposase induction as determined by UPTAG sequencing in three independent experiments**

## Supplemental Table 2 Oligonucleotides

| Oligo  | Sequence                                                                              | Description                                                                                    |
|--------|---------------------------------------------------------------------------------------|------------------------------------------------------------------------------------------------|
| SHE027 | caatAAGCTTgacctgcgagcagggaacgc                                                        | HindIII plus NATMAX<br>forward primer                                                          |
| SHE028 | ctatGCATGCcgacactggatggcggcgtagtadc                                                   | SphI plus NATMAX<br>reverse primer                                                             |
| SHE029 | gctggcttaactatgcggcatc                                                                | forward primer to amplify<br><i>URA3</i> from pRS416.                                          |
| SHE030 | acgtttacaatttcctgatgcgg                                                               | Reverse primer to amplify<br><i>URA3</i> from pRS416.                                          |
| SHE031 | ggaacgtgctgctactcatcctagtcctgttgctgccaag<br>ctatttaaCACTTGGATTGCGGGAAACGAG            | Forward primer to amplify<br><i>piggyBat</i> , with 48 bp of<br>flanking <i>URA3</i>           |
| SHE032 | acatccaatgaagcacacaagttgttgctttcgtgcatg<br>ataTTAACAACACTACGGTGTCGGGTGAATT<br>TCCC    | Reverse primer to amplify<br><i>piggyBat</i> , with 45 bp of<br>flanking <i>URA3</i>           |
| SHE061 | ttaggacggatcgcttgctgtaacttacacgcgcctcgt<br>atcttTTAACAACACTTGGATTGCGGGAAACG<br>AG     | Forward primer to amplify<br><i>piggyBat</i> TIR, with 45 bp<br>of flanking pRS414<br>backbone |
| SHE062 | ataaaaataaataaacacagagtaaattcccaaattatt<br>ccatcaTTAACAACACTACGGTGTCGGGTGAA<br>TTTCCC | Reverse primer to amplify<br><i>piggyBat</i> TIR, with 45 bp<br>of flanking pRS414             |



|        |                                                       |                                                                                                                             |
|--------|-------------------------------------------------------|-----------------------------------------------------------------------------------------------------------------------------|
|        |                                                       | backbone                                                                                                                    |
| SHE091 | CGCCATCCAGTGTCTCGACTAGTGAATTC                         | Forward primer inside L<br>of <i>piggyBat</i> TIR+NatMX<br>with Sall site.                                                  |
| SHE092 | CCATcccGGGGGATCCACTAGTTC                              | reverse primer inside<br><i>piggyBat</i> transposase<br>gene with BamHI site.                                               |
| SUN142 | ccacctgggtcctttcatcacgtcctataaaaataattata<br>atttaa   | Used to introduce a<br>single bp mutation in the<br><i>CDE1</i> element of <i>CEN6</i><br>at position 8, a G to C<br>change |
| SUN143 | atttaaattataattattttataggacgtgatgaaaaggac<br>ccaggtgg | Used to introduce a<br>single bp mutation in the<br><i>CDE1</i> element of <i>CEN6</i><br>at position 8, a G to C<br>change |

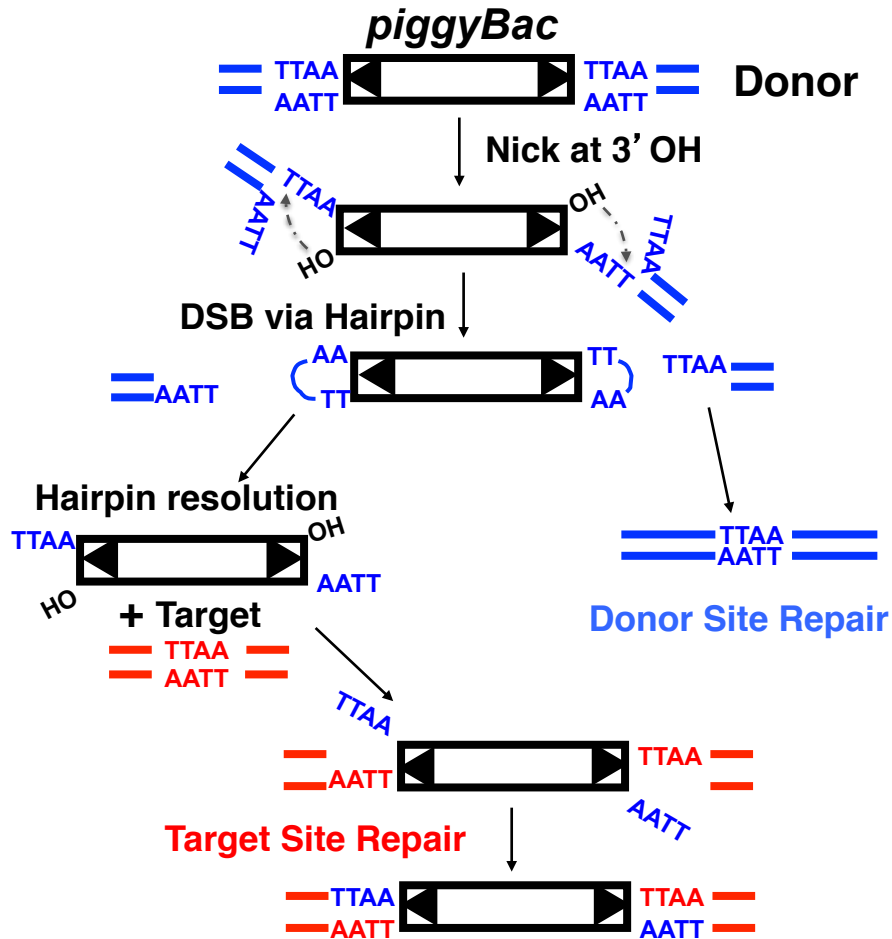

**Fig 1.** *piggyBac* transposition pathway. *piggyBac* transposition is initiated by nicks at the 3' transposon ends. The exposed 3'OHs then attack the complementary strand 4 nt inside the flanking donor DNA to form the hairpins on the transposon ends. Once the transposon is released from the donor site, the double strand break in the donor backbone is precisely repaired to the pre-insertion TTA sequence. The hairpins on the transposon ends are nicked at the 3' transposon ends to expose the 3'OHs. The 3'OH transposon ends attack the TTA target sequence at staggered positions, forming covalent links between the 3' end of the transposon and the 5' ends of the target site. The single strand gap between the 3' ends of the target DNA and the 5' ends of the transposon are repaired to generate the four bp TTA target sequence duplication.

**Fig 1**

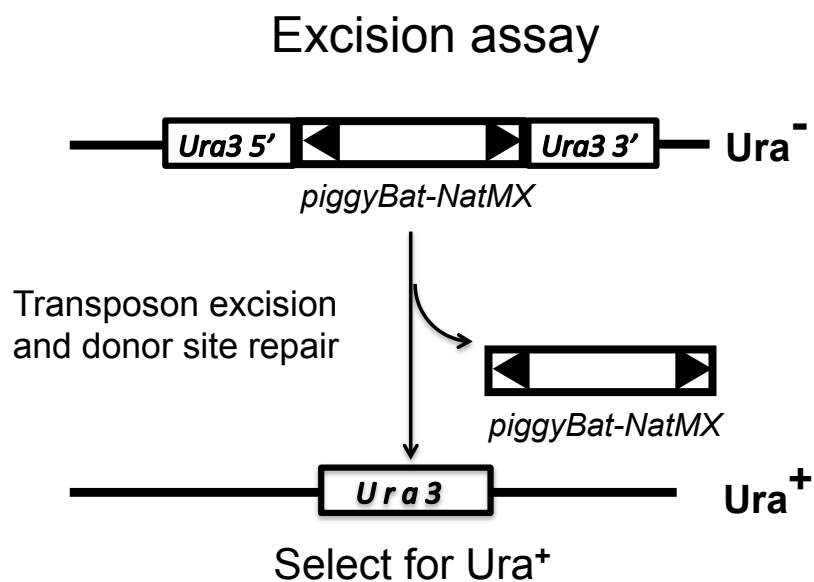

**Fig 2.** Schematic of the *piggyBat* excision assay. *piggyBat* is excised from *ura3::mini-piggyBat-Nat* upon transposase induction and the gapped donor backbone is repaired to generate *URA3*, the cell being converted from a uracil auxotroph to a uracil prototroph.

**Fig 2**

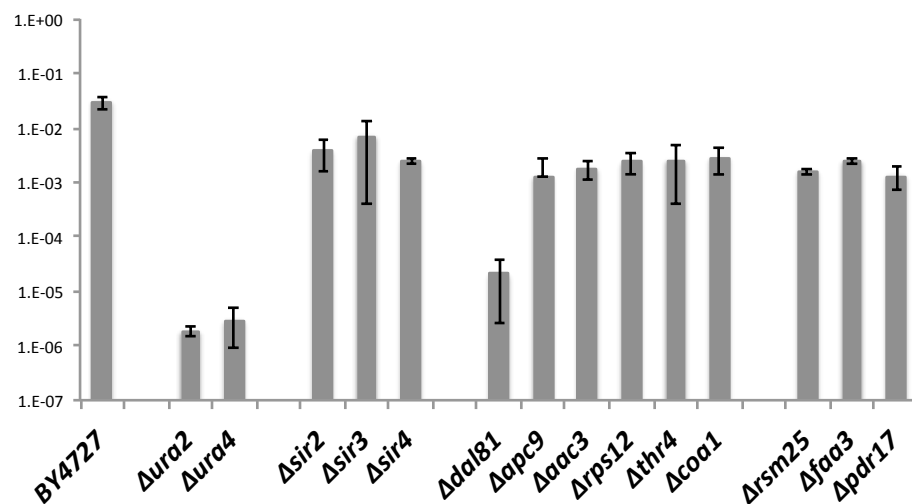

**Fig 3.** The *piggyBat* excision frequency assayed in individual deletion mutants. *piggyBat* excision was determined using pWS1-Excision in the indicated deletion mutant strains. The average frequency of three independent experiments is shown.

**Fig 3**

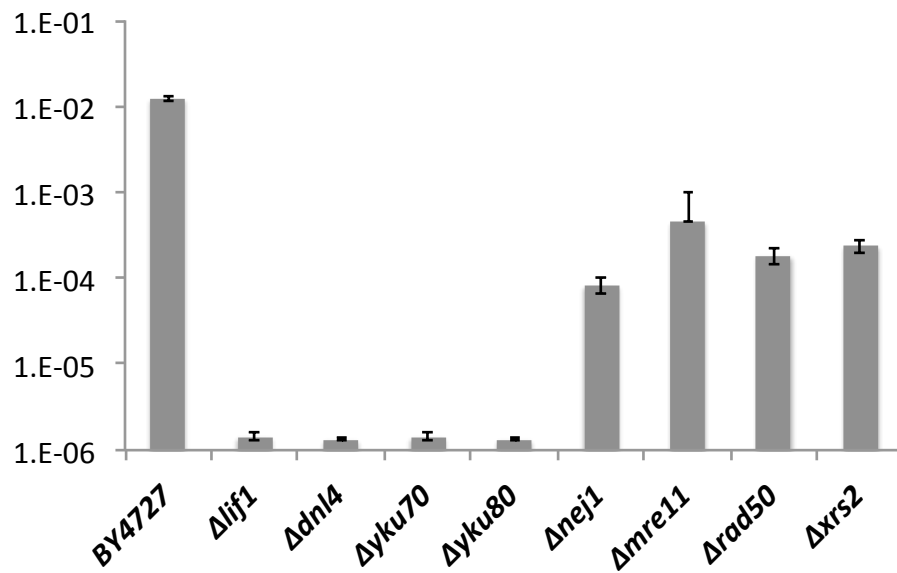

**Fig 4.** The *piggyBat* excision frequency assayed in individual NHEJ deletion mutants. *piggyBat* excision was determined using pWS1-Excision in the indicated NHEJ deletion mutant strains. The average frequency of three independent experiments is shown.

**Fig 4**

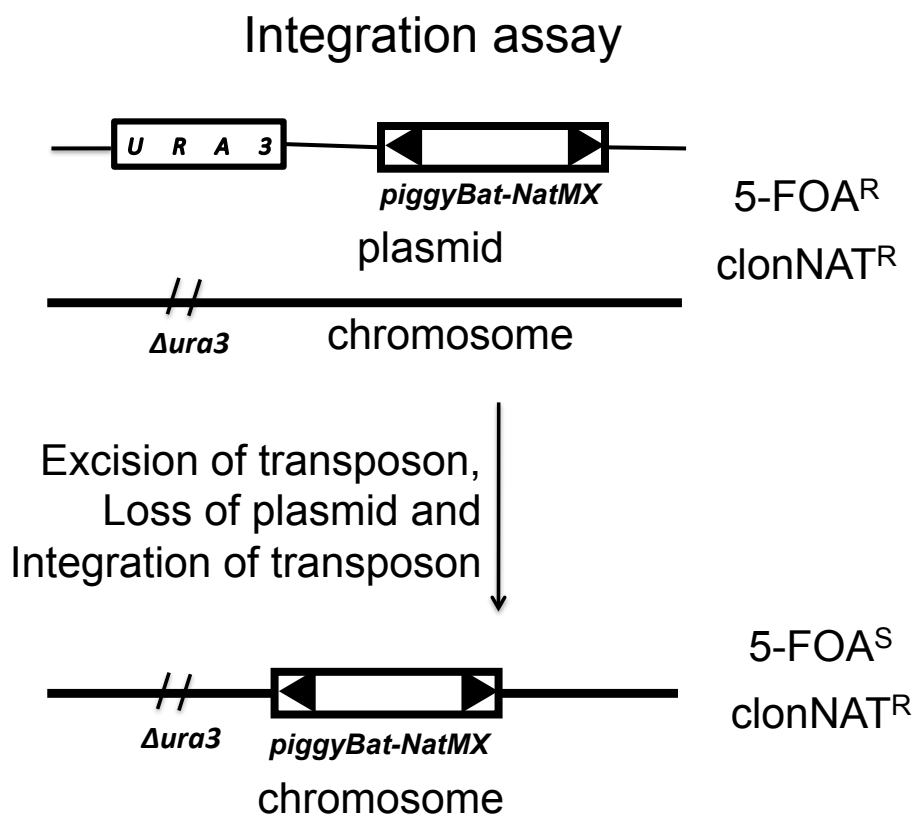

**Fig 5.** The *piggyBat* integration assay. Mini-*piggyBat-Nat* on a *URA3* plasmid is excised upon transposase induction and can integrate in the chromosome. Integration events are assayed as cells that retain the mini-*piggyBat-Nat* ( $\text{Clon}^R$ ) but have lost the donor plasmid ( $5\text{-FOA}^R$ ).

**Fig 5**

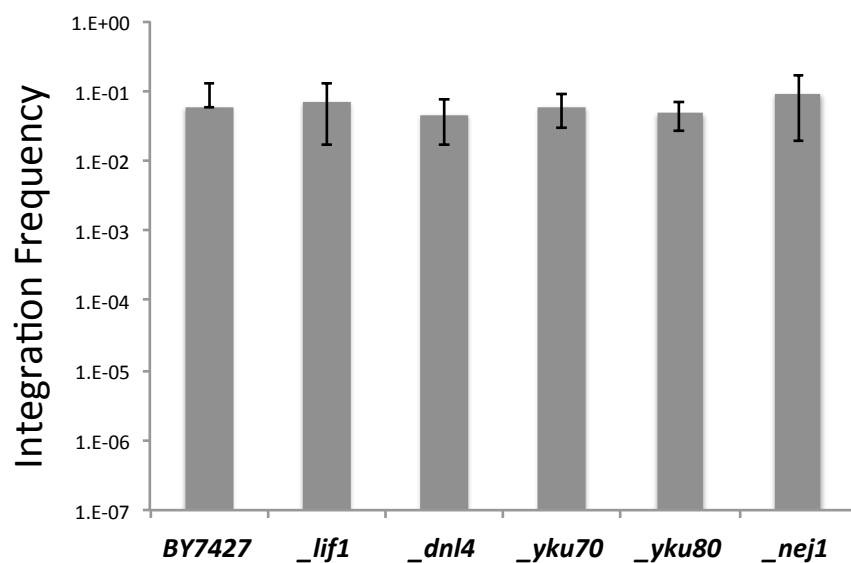

**Fig 6.** *piggyBat* integration frequency in individual NHEJ deletion mutants. *piggyBat* integration using pWS2-Integration was measured in the indicated deletion strains. The average integration frequency of three independent experiments is shown. *piggyBat* excision frequency was also assayed in each deletion strain using pWS2-Integration D transposase and the frequency of excision was at least 100-fold lower than with transposase.

**Fig 6**

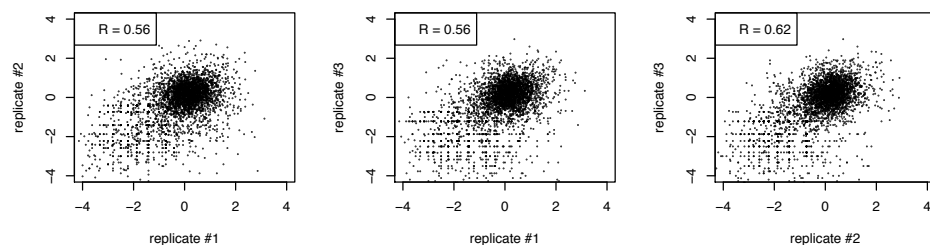

**Supplemental Figure S1.** Correlation values for comparison of log2 ratios of barcode sequencing reads from three independent experimental replicates

**Supplemental Figure S1**



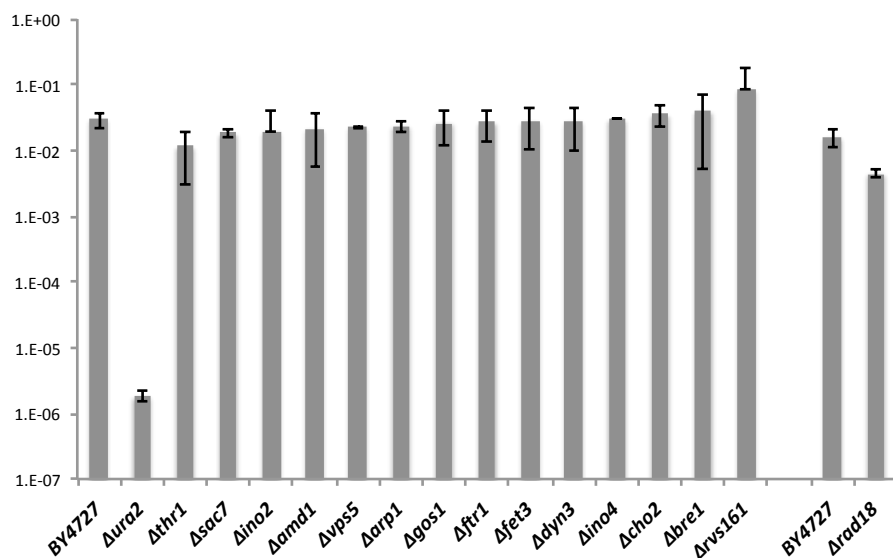

**Supplemental Figure S2.** The *piggyBat* excision frequency re-assayed in indicated individual deletion mutants. *piggyBat* excision was determined using pWS1-Excision in the indicated deletion mutant strains. The average frequency of three independent experiments is shown. *Δrad18* was assayed separately from other mutants.

**Supplemental Figure S2**

## Literature Cited

- Abdelhakim, A., R. Sauer and T. Baker, 2010 The AAA+ ClpX machine unfolds a keystone subunit to remodel the Mu transpososome. *Proc Natl Acad Sci U S A* 107: 2437-2443.
- Benoist, P., P. Feau, A. Pliss, J. Vorisek, R. Antonelli *et al.*, 2000 The yeast Ura2 protein that catalyses the first two steps of pyrimidines biosynthesis accumulates not in the nucleus but in the cytoplasm, as shown by immunocytochemistry and Ura2-green fluorescent protein mapping. *Yeast* 16: 1299-1312.
- Brachmann, C., A. Davies, G. Cost, E. Caputo, J. Li *et al.*, 1998 Designer deletion strains derived from *Saccharomyces cerevisiae* S288C: a useful set of strains and plasmids for PCR-mediated gene disruption and other applications. *Yeast* 14: 115-132.
- Choi, W., and R. M. Harshey, 2010 DNA repair by the cryptic endonuclease activity of Mu transposase. *Proc Natl Acad U S A* 107: 10014-10019.
- Craig, N. L., 2002 Tn7, pp. 423-456 in *Mobile DNA II*, edited by N. L. Craig, R. Craigie, M. Gellert and A. Lambowitz. ASM Press, Washington, D.C.
- Craig, N. L., R. Craigie, M. Gellert and A. Lambowitz, 2002 *Mobile DNA II*. ASM Press, Washington, D.C.
- Daley, J., P. Palmbo, D. Wu and T. Wilson, 2005 Nonhomologous end joining in yeast. *Annu Rev Genet* 39: 431-451.
- Ding, S., X. Wu, G. Li, M. Han, Y. Zhuang *et al.*, 2005 Efficient transposition of the piggyBac (PB) transposon in mammalian cells and mice. *Cell* 122: 473-483.

- Dubois, E., J. Bischerour, A. Marmignon, N. Mathy, V. Regnier *et al.*, 2012 Transposon Invasion of the Paramecium Germline Genome Countered by a Domesticated PiggyBac Transposase and the NHEJ Pathway. *Int J Evol Biol* 2012: 436196.
- Dudasova, Z., A. Dudas and M. Chovanec, 2004 Non-homologous end-joining factors of *Saccharomyces cerevisias*. *FEMS Microbiol Rev* 28: 581-601.
- Fraser, M. J., T. Ciszczon, T. Elick and C. Bauser, 1996 Precise excision of TTAA-specific lepidopteran transposons piggyBac (IFP2) and tagalong (TFP3) from the baculovirus genome in cell lines from two species of Lepidoptera. *Insect Mol Biol* 5: 141-151.
- Gangadharan, S., L. Mularoni, J. Fain-Thornton, S. J. Wheelan and N. L. Craig, 2010 DNA transposon Hermes inserts into DNA in nucleosome-free regions in vivo. *Proc Natl Acad Sci U S A* 107: 21966-21972
- Giaever, G., A. Chu, L. Ni, C. Connelly, L. Riles *et al.*, 2002 Functional profiling of the *Saccharomyces cerevisiae* genome. *Nature* 418: 387-391.
- Gonzalez-Estevez, C., T. Momose, W. Gehring and E. Salo, 2003 Transgenic planarian lines obtained by electroporation using transposon-derived vectors and an eye-specific GFP marker. *Proc Natl Acad Sci U S A* 100: 14046-14051.
- Handler, A., 2002 Use of the piggyBac transposon for germ-line transformation of insects. *Insect Biochem. Mol. Biol.* 32: 1211-1220.
- Lacroute, F., 1968 Regulation of pyrimidine biosynthesis in *Saccharomyces cerevisiae*. *J Bacteriol* 95: 824-832.
- Langmead, B., and S. Salzberg, 2012 Fast gapped-read alignment with Bowtie 2. *Nat Methods* 9: 357-359.

- Mcvey, M., D. Radut and J. Sekelsky, 2004 End-joining repair of double-strand breaks in *Drosophila melanogaster* is largely DNA ligase IV independent. *Genetics* 168: 2067-2076.
- Mitra, R., J. Fain-Thornton and N. Craig, 2008 piggyBac can bypass DNA synthesis during cut and paste transposition. *EMBO J.* 27: 1097-1109.
- Mitra, R., X. Li, A. Kapusta, D. Mayhew, R. Mitra *et al.*, 2013 Functional characterization of piggyBat from the bat *Myotis lucifugus* unveils the first active mammalian DNA transposon. *Proc Natl Acad Sci U S A* 110: 234-239.
- Nishizawa-Yokoi, A., M. Endo, N. Ohtsuki, H. Saika and S. Toki, 2015 Precision genome editing in plants via gene targeting and piggyBac-mediated marker excision. *Plant J* 81: 160-168.
- North, S. H., and H. Nakai, 2005 Host factors that promote transpososome disassembly and the PriA-PriC pathway for restart primosome assembly. *Mol Microbiol* 56: 1601-1616.
- Peters, J. E., and N. L. Craig, 2001a Tn7 recognizes target structures associated with DNA replication using the DNA binding protein TnsE. *Genes Dev* 15: 737-747.
- Peters, J. E., and N. L. Craig, 2001b Tn7: smarter than we thought. *Nat Rev Mol Cell Biol* 2: 806-814.
- Ray, D., C. Feschotte, H. Pagan, J. Smith, E. Pritham *et al.*, 2008 Multiple waves of recent DNA transposon activity in the bat, *Myotis lucifugus*. *Genome Res* 18: 717-728.

- Rine, J., and I. Herskowitz, 1987 Four genes responsible for a position effect on expression from HML and HMR in *Saccharomyces cerevisiae*. *Genetics* 116: 9-22.
- Rinehart, T., C. Dean and C. Weil, 1997 Comparative analysis of non-random DNA repair following Ac transposon excision in maize and *Arabidopsis*. *Plant J* 12: 1419-1427.
- Sarkar, A., R. Sengupta, J. Krzywinski, X. Wang, C. Roth *et al.*, 2003 P elements are found in the genomes of nematoceran insects of the genus *Anopheles*. *Insect Biochem Mol Biol* 33: 381-387.
- Smith, A., L. Heisler, J. Mellor, F. Kaper, M. Thompson *et al.*, 2009 Quantitative phenotyping via deep barcode sequencing. *Genome Res* 19: 1836-1842.
- Symington, L. S., and J. Gautier, 2011 Double-strand break end resection and repair pathway choice. *Annu Rev Genet* 45: 247-271.
- Syvanen, M., J. D. Hopkins and M. Clements, 1982 A new class of mutants in DNA polymerase I that affects gene transposition. *J Mol Biol* 158: 203-212.
- Trujillo, K., D. Roh, L. Chen, S. Van Komen, A. Tomkinson *et al.*, 2003 Yeast xrs2 binds DNA and helps target rad50 and mre11 to DNA ends. *J Biol Chem* 278: 48957-48964.
- Valencia, M., M. Bentele, M. Vaze, G. Herrmann, E. Kraus *et al.*, 2001 NEJ1 controls non-homologous end joining in *Saccharomyces cerevisiae*. *Nature* 404: 666-669.
- Walisko, O., Z. Izsvak, K. Szabo, C. D. Kaufman, S. Herold *et al.*, 2006 Sleeping Beauty transposase modulates cell-cycle progression through interaction with Miz-1. *Proc Natl Acad Sci U S A* 103: 4062-4067.

- Wardle, S., A. Chan and D. Haniford, 2009 H-NS binds with high affinity to the Tn10 transpososome and promotes transpososome stabilization. *Nucleic Acids Res* 37: 6148-6160.
- Willer, M., M. Rainey, T. Pullen and C. Stirling, 1999 The yeast CDC9 gene encodes both a nuclear and a mitochondrial form of DNA ligase I. *Curr Biol* 9: 1085-1094.
- Woodard, L., X. Li, N. Malani, A. Kaja, R. Hice *et al.*, 2012 Comparative analysis of the recently discovered hAT Transposon TcBuster in human cells. *PLoS ONE* 7: e42666.
- Yant, S., and M. Kay, 2003 Nonhomologous-end-joining factors regulate DNA repair fidelity during Sleeping Beauty element transposition in mammalian cells. *Mol Cell Biol* 23: 8505-8518.
- Yu, J., K. Marshall, M. Yamaguchi, J. E. Haber and C. F. Weil, 2004 Microhomology-dependent end joining and repair of transposon-induced DNA hairpins by host factors in *Saccharomyces cerevisiae*. *Mol Cell Biol* 24: 1351-1364.
